# Supplementary material
Source: PubMed Central journal article supplement (PMC2868505)
Supplement: NIHMS108635-supplement-1_si_001.pdf [file NIHMS108635-supplement-1_si_001.pdf]

## Supplementary Figure 1

### a CDC27 Input

|                          | HeLa cell lysate |        |        |         | Wheat germ extract |        |        |         |
|--------------------------|------------------|--------|--------|---------|--------------------|--------|--------|---------|
| Input concentration      | 10 mg/ml         |        |        |         | 2 mg/mL            |        |        |         |
| Volume analyzed per well | 10 uL            |        |        |         | 10 uL              |        |        |         |
| Final Dilution           | [1/16]           | [1/32] | [1/68] | [1/136] | [1/16]             | [1/32] | [1/68] | [1/136] |

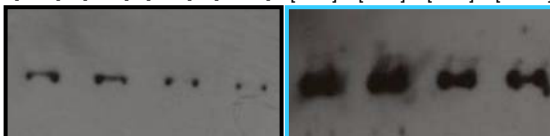

### b CDC27 Output

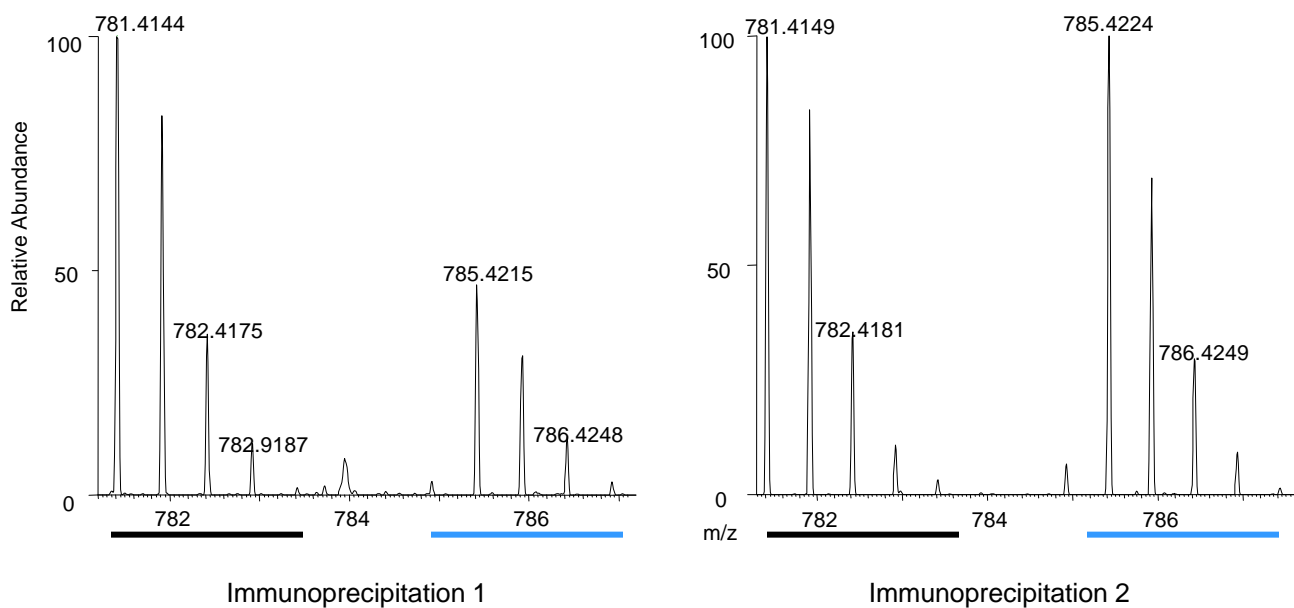

# Supplementary Figure 2

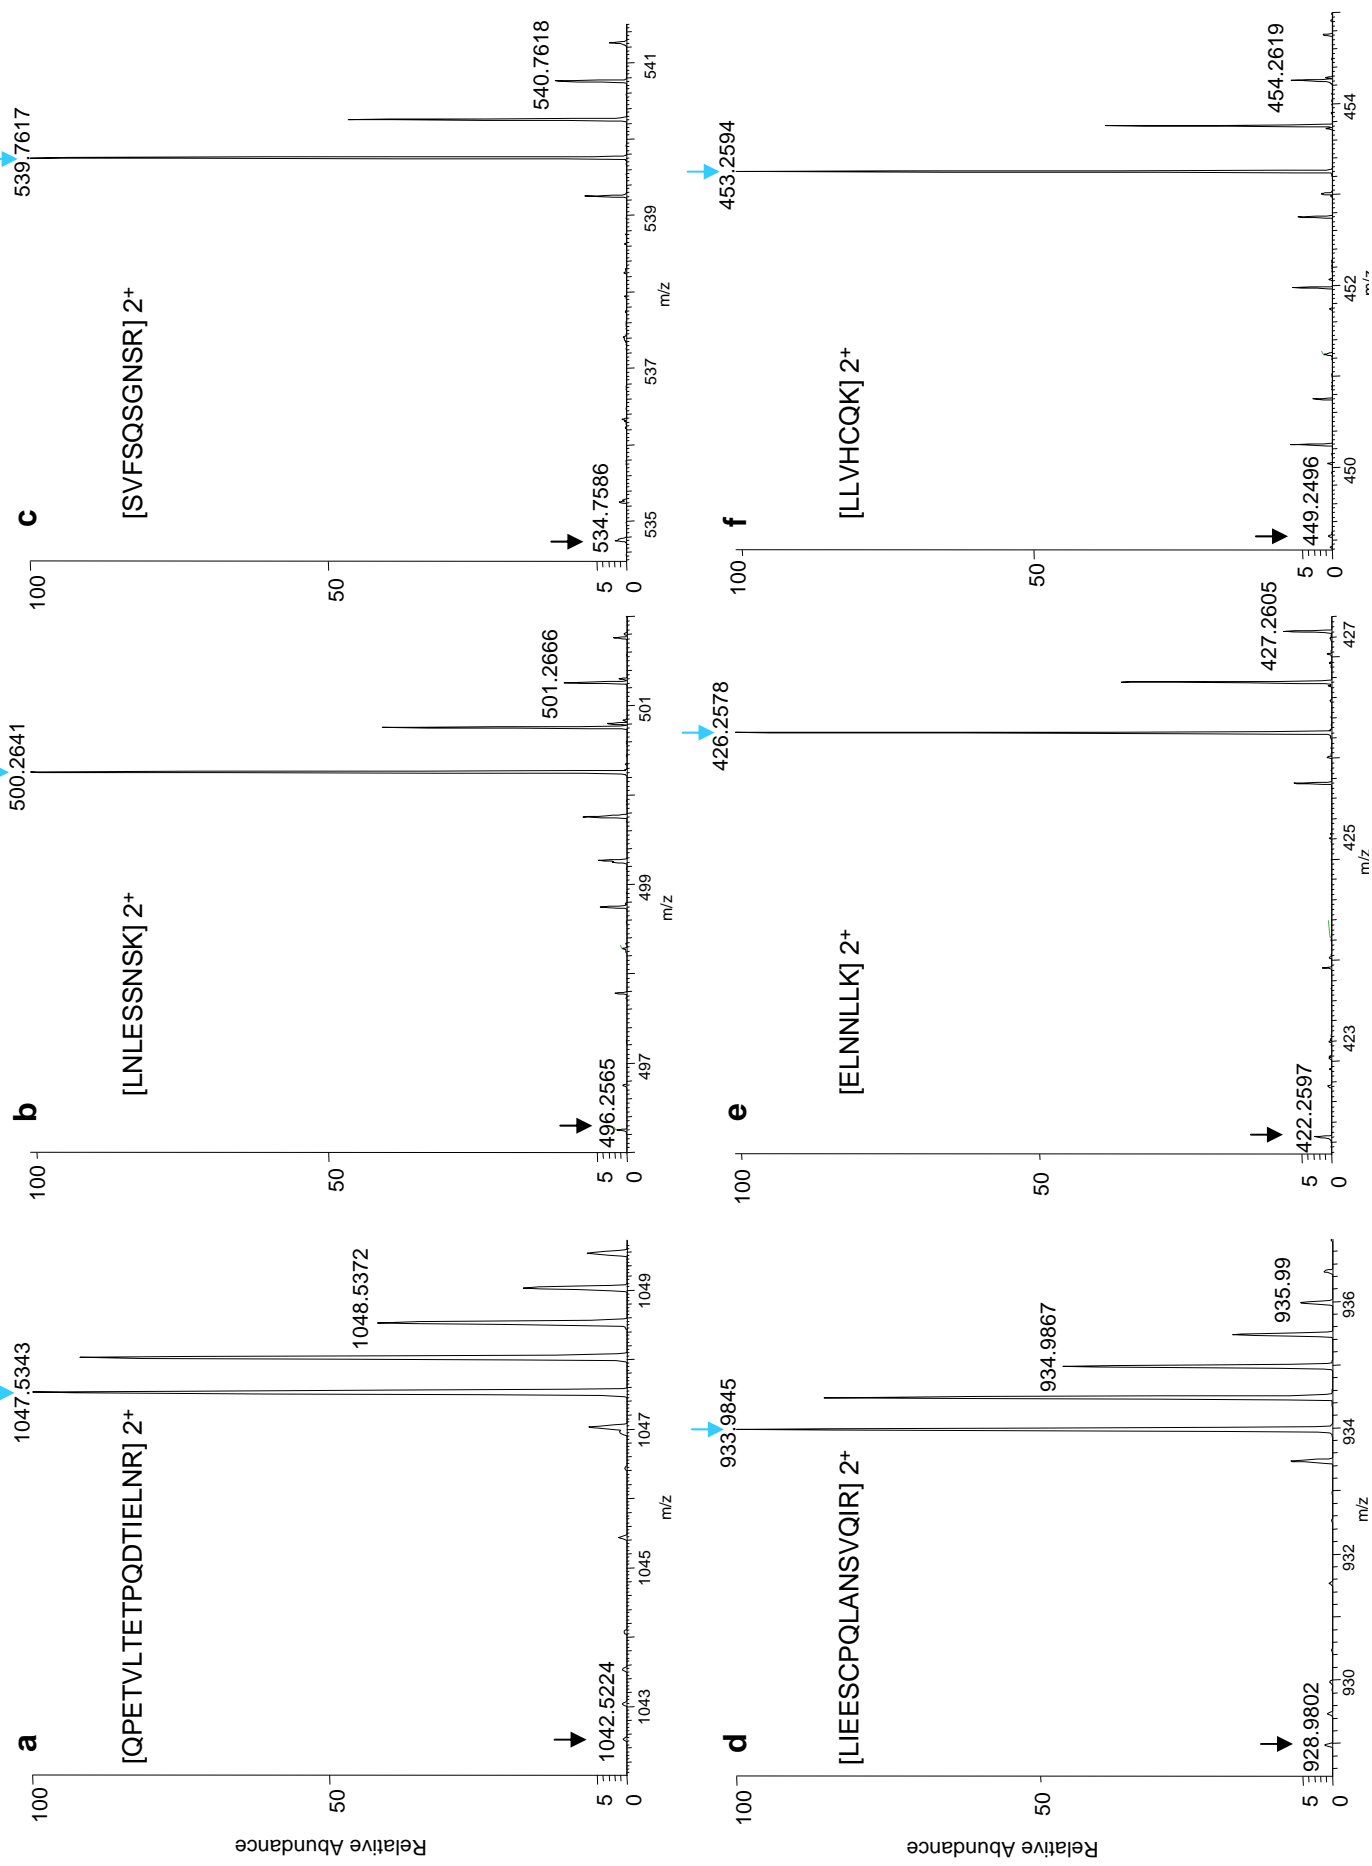

# Supplementary Figure 3

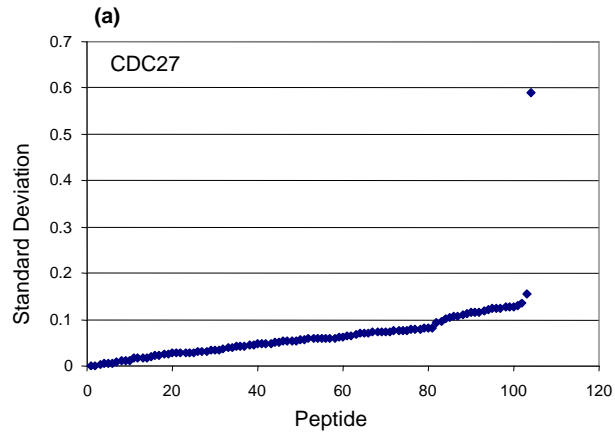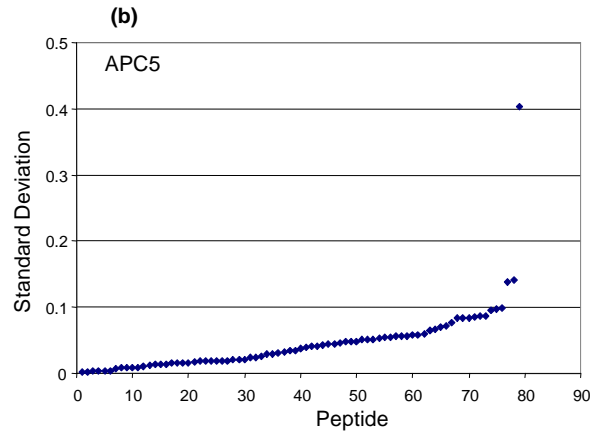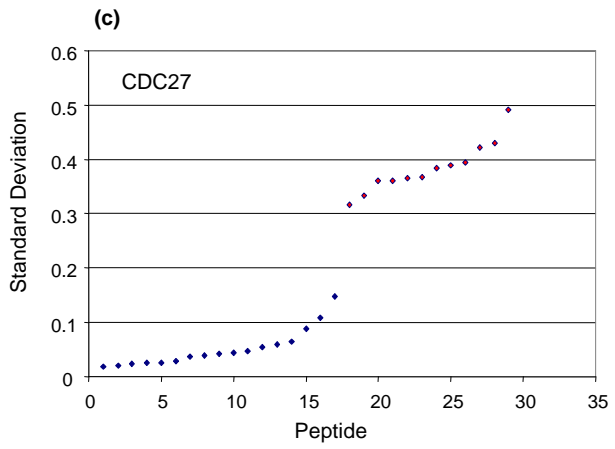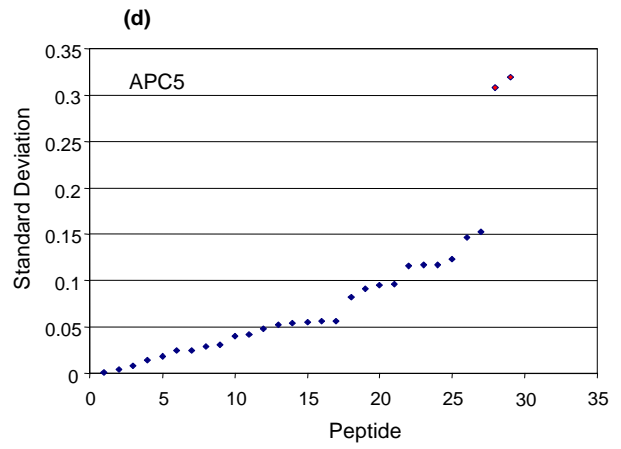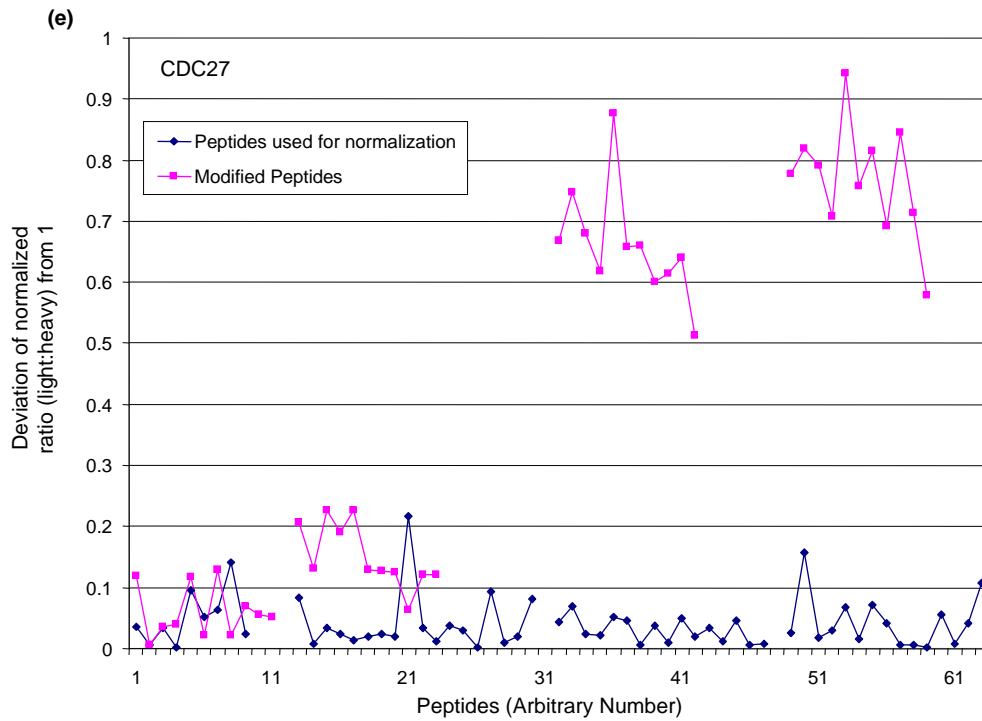

| Vector              | Tag                                | Source             |
|---------------------|------------------------------------|--------------------|
| pEU-E01-His-TEV-N1  | MGHHHHHHYDIPTTENLYFQGDISR          | Cell Free Sciences |
| pEU-E01-His-TEV-C1  | LEENLYFQGDYDIPPTTHHHHHH-           | Cell Free Sciences |
| pEU-E01-His-N1-FLEX | MGHHHHHHK <b>TENLYFQGDISR</b>      | This study         |
| pEU-E01-His-C1-FLEX | LEK <b>TENLYFQGDISR</b> PTTHHHHHH- | This study         |

Site-directed mutagenesis required to generate the FLEX-tag peptide

| Mutation/Vector             | Primers (forward listed)                           | Template           |
|-----------------------------|----------------------------------------------------|--------------------|
| N1 T14K/pEU-E01-His-N1-FLEX | catcaagattacgacatcccaaaaaccgaaaaccgtattttcagggc    | pEU-E01-His-TEV-N1 |
| C1insertKT                  | ccaagatatacactagttctcgagagagaccgaaaaccgtattttcaggg | pEU-E01-His-TEV-C1 |
| C1 DI>SR                    | cctgtatttcagggagattactcgaggccaacgaccatcatcatc      | C1 insertKT        |
| C1 Y>I/pEU-E01-His-C1-FLEX  | cctgtatttcagggagatatatcaggccaacgaccatcatcatc       | C1 DI>SR           |

APC constructs

| APC subunit clone | Primers                                                                      | Backbone/restriction sites            |
|-------------------|------------------------------------------------------------------------------|---------------------------------------|
| cdc27             | gcgcccaggatgacggctgcgaggaaccgctc<br>gcgcggtacccttaaaatcattcatttcagctgca      | pEU-E01-His-TEV-N1-AQUA<br>Xho1, Kpn1 |
| apc5              | gcctcgaggatggccagcgtccacgagagcctctac<br>gcactagctagagatgggtttatcaagggtaacccc | pEU-E01-His-TEV-N1-AQUA<br>Xho1, SpeI |

Supplementary Table 1. Vectors used for *in vitro* expression of the APC subunits. The residues surrounding the TEV site (italicized) were substituted to generate the FLEX-tag peptide (bolded). Restriction sites used to subclone the APC subunits are underlined.
